# Supplementary material
Source: publisher site journal article supplement (https://www.dovepress.com/article/217935)
Supplement: Supplementary file 1 [file get_supplementary_file.php]

Table S1 Relationship between Pretherapy LMR, PLR and TACE period, RFA period in HCC

| Characteristics | LMR | | P | PLR | | P |
| --- | --- | --- | --- | --- | --- | --- |
| ≤**2.13** | >**2.13** | ≤**95.65** | >**95.65** |
| TACE period | 2(1.9,3.0) | 3(1.7,4.0) | 0.135 | 2(1.5,4.1) | 2(1.0,4.0) | 0.712 |
| RFA period | 2(1.0,2.75) | 2(1.0,4.0) | 0.181 | 2(1.1,2.1) | 2(1.1,3.9) | 0.126 |





**Fig. S1** Relationship between pretreatment with LMR, PLR and TACE period, RFA period in HCC.

**A:** LMR and TACE period; **B:** LMR and RFA period; **C:** PLR and TACE period; **D:** PLR and RFA period.

**

**

**Fig. S2** ROC curves with NLR.
